# Supplementary material for: Natural biocide cocktails: Combinatorial antibiotic effects of prodigiosin and biosurfactants
Source: PubMed Central journal article supplement (PMC6053208; doi:10.1371/journal.pone.0200940), 2018-07-19
Supplement: pone.0200940.s002.pdf [file pone.0200940.s002.pdf]

# Natural biocide cocktails: Combinatorial antibiotic effects of prodigiosin and biosurfactants

Jennifer Hage-Hülsmann, Alexander Grünberger, Stephan Thies, Beatrix Santiago-Schübel, Andreas Sebastian Klein, Jörg Pietruszka, Dennis Binder, Fabienne Hilgers, Andreas Domröse, Thomas Drepper, Dietrich Kohlheyer, Karl-Erich Jaeger, Anita Loeschcke

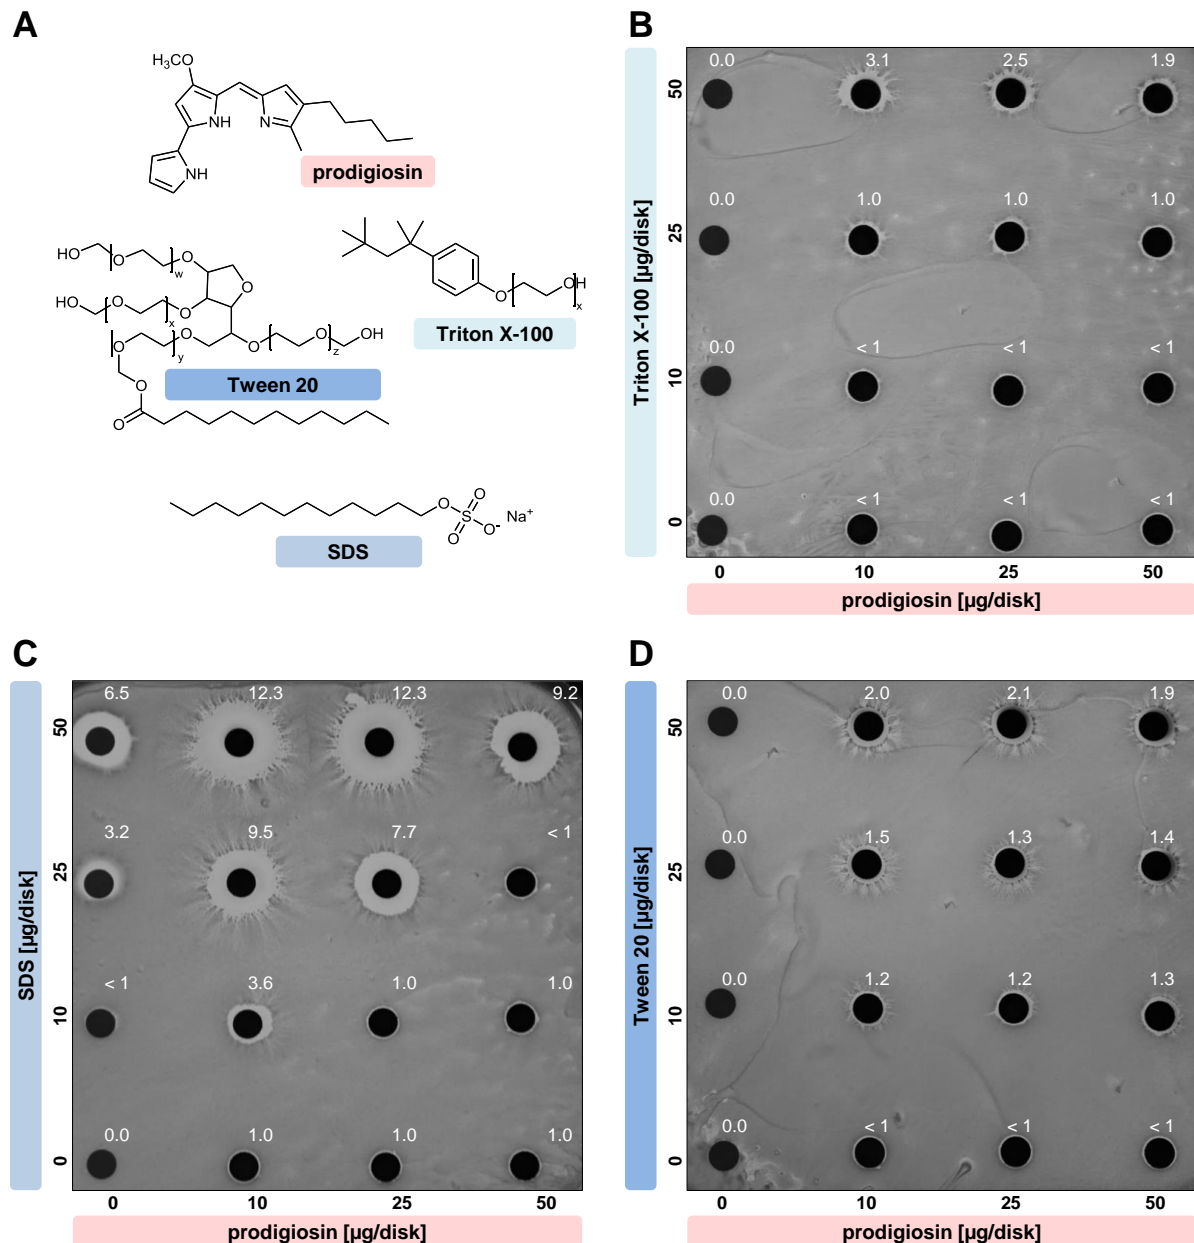

**S2 Fig. Disk diffusion assay showing combined effects of prodigiosin and synthetic surfactants on *C. glutamicum*.** (A) Applied compounds: Antibacterial pigment prodigiosin and synthetic surfactants Triton X-100 ( $x = 9-10$ ), SDS and Tween 20 ( $w + x + y + z = 16$ ). Combination matrices were implemented in disk diffusion assays on a lawn of *C. glutamicum* with compound combinations in series of 0, 10, 25, and 50  $\mu\text{g}/\text{disk}$ : (B) Combination of prodigiosin and Triton X-100, (C) combination of prodigiosin and SDS, (D) combination of prodigiosin and Tween 20. Shown photographed results are representative of triplicate experiments, all showing the same tendencies. Reach of inhibition zones from filter disks are indicated [mm].
