# Supplementary material for: Natural biocide cocktails: Combinatorial antibiotic effects of prodigiosin and biosurfactants
Source: PubMed Central journal article supplement (PMC6053208; doi:10.1371/journal.pone.0200940), 2018-07-19
Supplement: pone.0200940.s005.pdf [file pone.0200940.s005.pdf]

# Natural biocide cocktails: Combinatorial antibiotic effects of prodigiosin and biosurfactants

Jennifer Hage-Hülsmann, Alexander Grünberger, Stephan Thies, Beatrix Santiago-Schübel, Andreas Sebastian Klein, Jörg Pietruszka, Dennis Binder, Fabienne Hilgers, Andreas Domröse, Thomas Drepper, Dietrich Kohlheyer, Karl-Erich Jaeger, Anita Loeschcke

| Description                                                                            | Max score | Total score | Query cover | E-value | Identity | Similarity |
|----------------------------------------------------------------------------------------|-----------|-------------|-------------|---------|----------|------------|
| rhamnosyltransferase<br>[ <i>Dickeya dianthicola</i> ]<br>WP_024106541.1               | 539       | 539         | 98%         | 0.0     | 60%      | 75%        |
| rhamnosyltransferase subunit B<br>[ <i>Pseudomonas aeruginosa</i> PAO1]<br>NP_252168.1 | 220       | 220         | 91%         | 4e-68   | 31%      | 50%        |

```

NP_252168.1      1  MHALIATGSGAGDVPEFPIGLARLAKLRGHNVSICLTPVFRDAVEQHGIAFVFLSDELTVRRTMGDFRLWDPKTSFGVLWQATAGMIEPVVBYVSA
WP_024106541.1  1  MRVFLSLTGSAGDVYPIIRFGEAERKNGGLDVIYCTPFYEQTKRERGMSTFVGSSEDLKLVNSQRZWHQOSEKEMVKEHNAQQOQADAVV
WP_021016571.1  1  MKIFLALGSGAGDVYPIAIGESLITQAGYDVIYCTNPFPEKTALEERHEHFEIVGANEVYLAVNSKRZWHKRYATKEECHMMQQOQLYDAENS

NP_252168.1      96  QRHDDIVVVGSLWALGRTAHERKYGIPYLSAQVSPSTLMSAHLPPVHPKFNVPQMPFLAMRKLWRCLEKFLDRTCAPPETNAVRKVGLETPVK
WP_024106541.1  96  RVDKSSVITLSLWAFSAKMLSEKKGCCVFPVRSPTLMSAYETAHRRYTAQLSHPFRIRREVLGLTERVITDRSEAPLNOFRVSLGLP-KEH
WP_021016571.1  96  VTDSSSILLTSLWAFSAKMLSEKKGCCVFPVRSPTLMSAYETAHRRYTAQLSHPFRIRREVLGLTERVITDRSEAPLNOFRVSLGLP-KEH

NP_252168.1      191  RIFQWVHSP-QGVVCLFPFAWFAFPQODWFOPLHMGFFLEFGSIPGTFLDDELRQRFIDQGSRLVFLQGSTEHLQGFYVMALRALERLQVGRGI
WP_024106541.1  190  RVLPSVHRFDAAALLCFPEWESPLPDWFDHVRQVGFPLNML--DNGQDDLAQET-ARRRZVIEFMPSNALSARRSLAI---SFLVKKRQRCY
WP_021016571.1  190  RLLPSWZHKRDSNVIICFPDPWFAAPQPDWRHKKQVGFPLNML--ARRQDDLDCEFNASNKVIEFMPSNALSARRSLAI---EFLVKKRRCY

NP_252168.1      285  FLTGACQE-PLRGLPNHVLQRAYAPLGLALTESCAGLVHDCGICGAMSLATAAGVPOVLLWPCAHDQFDNAERLVRHCCGMRRCVPLRQELRGAFWR
WP_024106541.1  279  QCLIVCKPFYHELADDFQVRAEGHTNLGQYLHRCALTIHGGGIGTMAQSFACITPQDVLPSAFDQFDNARRVTAKCGEWHFES-DIDKLDKRR
WP_021016571.1  280  QCLIVCKPFYHELADDFQVRAEGHTNLGQYLHRCALTIHGGGIGTMAQSFACITPQDVLPSAFDQFDNARRVTAKCGEWHFES-DIDKLDKRR

NP_252168.1      379  LLEDPAMAAACRRRPMELSPHSTACGKAAQVVER-----CHRECDARWLKAAS
WP_024106541.1  373  LLSADFLAEHCQRTRQQFPSEDAVGSHTVDTVREKVARHMAKVDSEHAVIHPD-
WP_021016571.1  374  TLFDRSAAQHCQYLRNDFANQAVYQQLVAIVEAQLNENTPMV-----

```

**S5 Fig. Sequence alignment of *Serratia* sp. ATCC 39006 putative glycosyltransferase with two putative homologs.** The putative glycosyltransferase from *Serratia* sp. ATCC 39006 (NCBI RefSeq WP\_021016571.1) was identified by BLASTP similarity search using the known rhamnosyl transferase RhIB from *Pseudomonas aeruginosa* (NCBI RefSeq NP\_252168.1) to search for similar sequences within the NCBI protein sequences database limited to *Serratia* sp. ATCC 39006 (Genome at NCBI Genbank Masterentry NZ\_AWXH0000000.1). The sequence of the putative glycosyltransferase from *Serratia* sp. ATCC 39006 was then subjected to NCBI protein sequences database similarity search with BLASTP and yielded the best scoring hit with the sequence of a putative rhamnosyltransferase from *Dickeya dianthicola*. Result table of BLASTP pairwise alignment of the *Serratia* sp. ATCC 39006 glycosyltransferase with the two homologous proteins and Clustal Omega (Sievers *et al.* (2011), doi:10.1038/msb.2011.75) multiple sequence alignment of all three proteins are shown.
