# Supplementary material for: Natural biocide cocktails: Combinatorial antibiotic effects of prodigiosin and biosurfactants
Source: PubMed Central journal article supplement (PMC6053208; doi:10.1371/journal.pone.0200940), 2018-07-19
Supplement: pone.0200940.s008.pdf [file pone.0200940.s008.pdf]

# Natural biocide cocktails: Combinatorial antibiotic effects of prodigiosin and biosurfactants

Jennifer Hage-Hülsmann, Alexander Grünberger, Stephan Thies, Beatrix Santiago-Schübel, Andreas Sebastian Klein, Jörg Pietruszka, Dennis Binder, Fabienne Hilgers, Andreas Domröse, Thomas Drepper, Dietrich Kohlheyer, Karl-Erich Jaeger, Anita Loeschcke

**S1 Table. Physicochemical properties and inhibitory effects of surfactants applied in this study.**

| surfactant <sup>1</sup>                        | type      | molecular weight [Da] <sup>2</sup> | CMC <sup>3</sup>                                                             | compound applied in assay <sup>4</sup>  | observed effects <sup>5</sup>                                                            |
|------------------------------------------------|-----------|------------------------------------|------------------------------------------------------------------------------|-----------------------------------------|------------------------------------------------------------------------------------------|
| <b>synthetic surfactants</b>                   |           |                                    |                                                                              |                                         |                                                                                          |
| Triton X-100 (octyl phenol ethoxylate)         | non-ionic | 625                                | 0.2-0.9 mM <sup>a</sup><br>0.012-0.056% (in water)                           | commercial                              | no inhibition alone, synergistic inhibition with prodigiosin (concentration-dependent)   |
| SDS (sodium dodecyl sulfate)                   | anionic   | 288                                | 7-10 mM <sup>a</sup><br>0.2-0.29% (in water)                                 | commercial                              | inhibition alone, synergistic inhibition with prodigiosin (concentration-dependent)      |
| Tween 20 (polysorbate 20)                      | non-ionic | 1228                               | 0.06 mM <sup>a</sup><br>0.0072% (in water)                                   | commercial                              | no inhibition alone, synergistic inhibition with prodigiosin (concentration-independent) |
| <b>biosurfactants</b>                          |           |                                    |                                                                              |                                         |                                                                                          |
| serrawettin W1 ( <i>Serratia marcescens</i> )  | non-ionic | 515 (C10, C10)                     | unknown                                                                      | raw extract from <i>P. putida</i>       | no inhibition alone, synergistic inhibition with prodigiosin (concentration-dependent)   |
| rhamnolipids ( <i>Pseudomonas aeruginosa</i> ) | anionic   | 679 (dirhamnolipid, C10, C10)      | 0.0005-0.02% <sup>b</sup> (dependent on conditions and congener composition) | commercial (from <i>P. aeruginosa</i> ) | inhibition alone, synergistic inhibition with prodigiosin (concentration-dependent)      |
| <i>N</i> -myristoyl-tyrosine (unknown)         | anionic   | 392                                | 2.9 mM <sup>c</sup><br>0.114% (in 0.1 M NaOH)                                | chemical synthesis                      | inhibition alone, synergistic inhibition with prodigiosin (concentration-dependent)      |

<sup>1</sup> compound with chemical designation (synthetic surfactants) or natural producer organism (biosurfactants).

<sup>2</sup> Triton X-100 contains 9-10 ethylene oxide units per molecule (see also S3 Fig.); MW is given as an average. Biosurfactants consist of several congeners differing in the hydroxyl fatty acids and in case of rhamnolipids in the number of sugar moieties; MW is given for one prominent congener and chain lengths are indicated.

<sup>3</sup> CMCs (critical micellar concentrations) are listed as determined in other studies; validity for experiments of the present study is limited as they are much dependent on the exact assay conditions. <sup>a</sup> Sigma Aldrich "detergent\_selection\_table", <sup>b</sup> [57], <sup>c</sup> [44].

<sup>4</sup> source of the compounds for their application in assays of the present study.

<sup>5</sup> summarized results from disk diffusion assays in a checkerboard matrix together with prodigiosin using *C. glutamicum* as model bacterium.
